# Supplementary material
Source: PubMed Central journal article supplement (PMC3223412)

Type of file: figure

Label: Figure S1

Filename: Overholtzer\_Supp\_FigS1.jpg

# Supplementary Figure S1

**a**

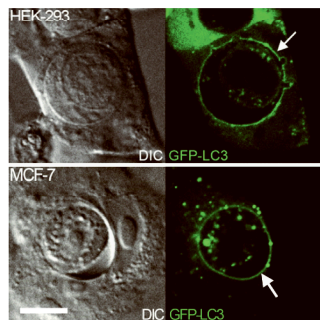

**b**

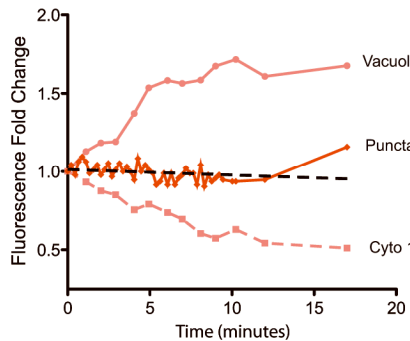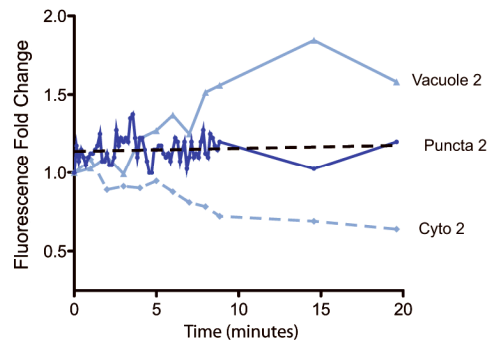

**c**

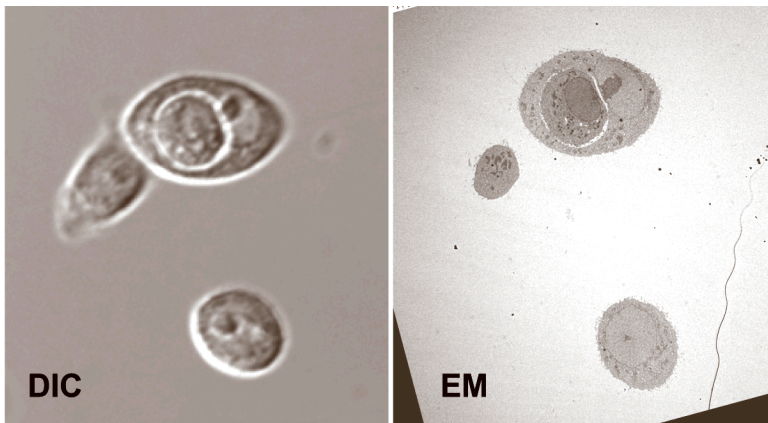

Type of file: figure

Label: Figure S2

Filename: Overholtzer\_Supp\_FigS2.jpg

# Supplementary Figure S2

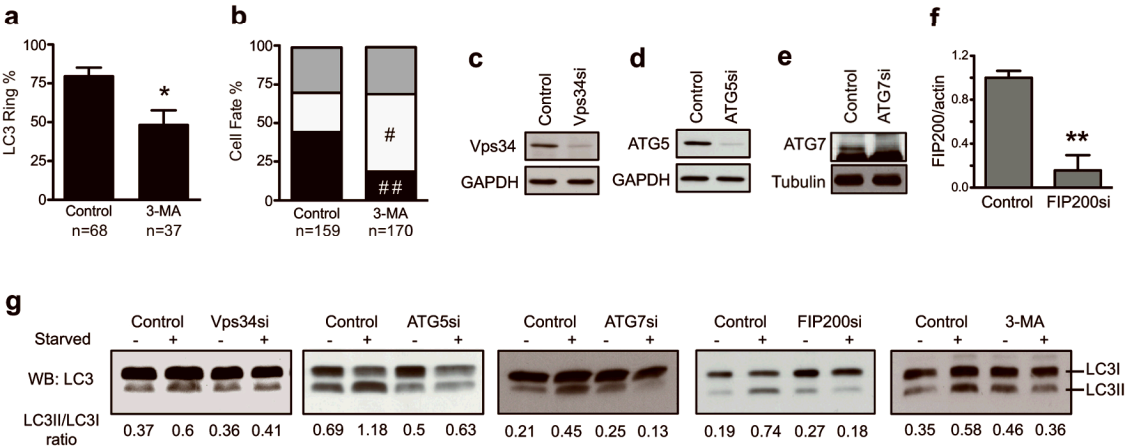

Type of file: figure

Label: Figure S3

Filename: Overholtzer\_Supp\_FigS3.jpg

# Supplementary Figure S3

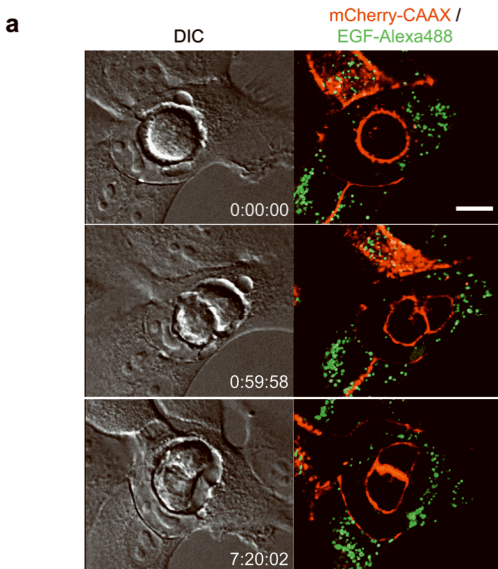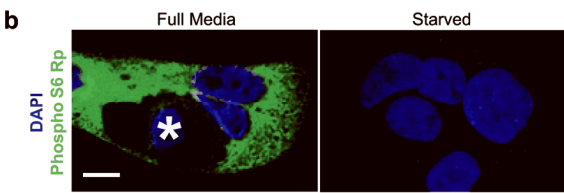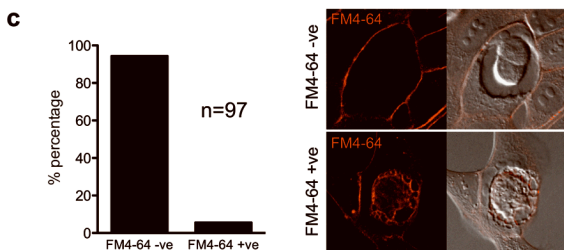

Type of file: figure

Label: Figure S4

Filename: Overholtzer\_Supp\_FigS4.jpg

# Supplementary Figure S4

**a**

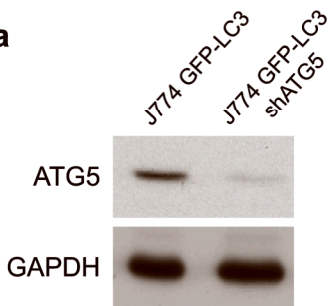

**b**

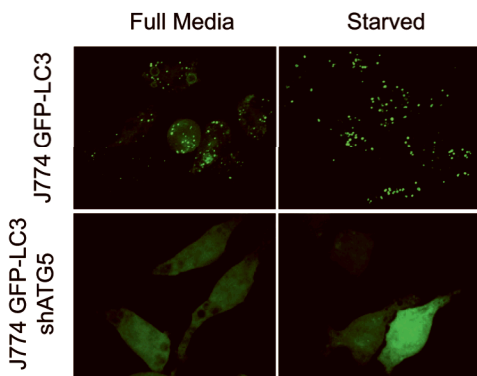

**c**

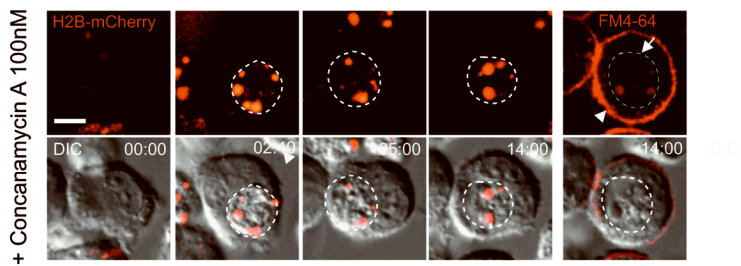

**d**

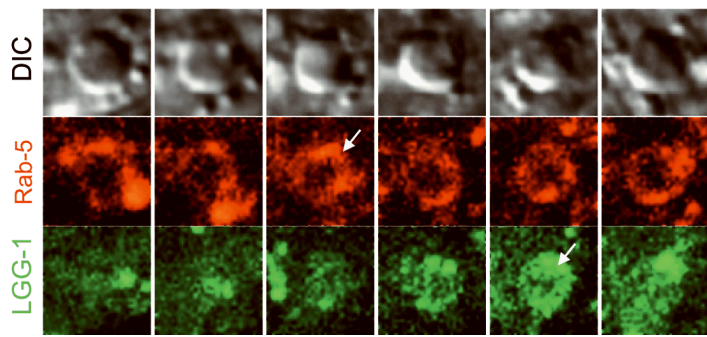



Type of file: figure

Label: Figure S5

Filename: Overholtzer\_Supp\_FigS5.jpg



Type of file: figure

Label: Figure S6

Filename: Overholtzer\_Supp\_FigS6.jpg

Figure S2c

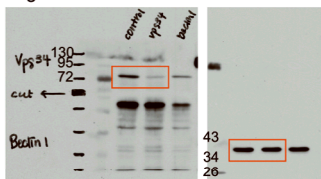

Figure S2d

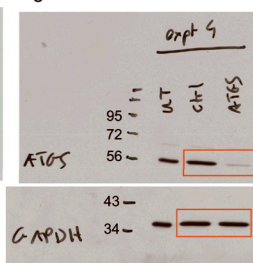

Figure S2e

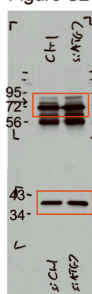

Figure S2g

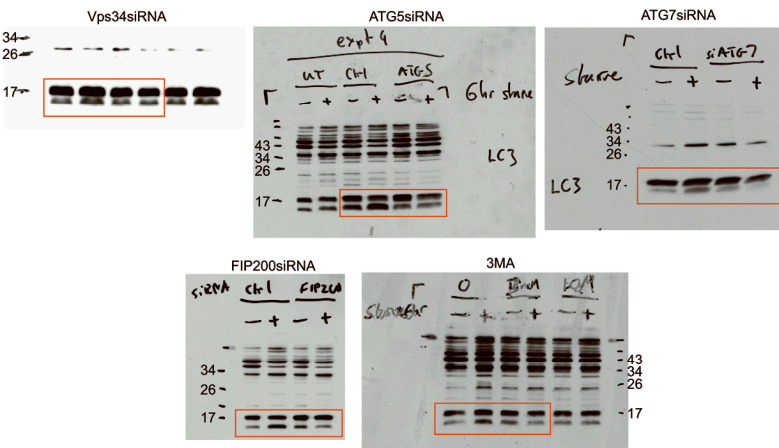

Figure S4a

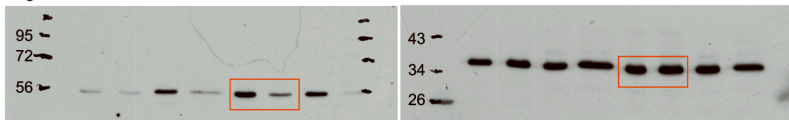

Supplement: NIHMS337227-supplement-01.pdf [file NIHMS337227-supplement-01.pdf]
